1 **Rapid, dose-dependent and efficient inactivation of surface dried SARS-CoV-2**  
2 **by 254 nm UV-C irradiation**

3

4 **Natalia Ruetalo<sup>1</sup>, Ramona Businger<sup>1</sup>, Michael Schindler<sup>1\*</sup>**

5 <sup>1</sup>Institute for Medical Virology and Epidemiology of Viral Diseases, University Hospital  
6 Tübingen, Tübingen, Germany

7

8

9

10

11

12

13

14

15

16

17 \*Correspondence should be addressed to:

18 Michael Schindler, [michael.schindler@med.uni-tuebingen.de](mailto:michael.schindler@med.uni-tuebingen.de)

19

20

21

22

23

24

25

26

27

28

29 **Abstract**

30 Background: The SARS-CoV-2 pandemic urges for cheap, reliable, and rapid technologies for  
31 disinfection and decontamination. One frequently proposed method is UV-C irradiation.  
32 However, UV-C doses necessary to achieve inactivation of high-titer SARS-CoV-2 are poorly  
33 defined.

34 Methods: Using a box and two handheld systems designed to decontaminate objects and  
35 surfaces we evaluated the efficacy of 254 nm UV-C treatment to inactivate surface dried SARS-  
36 CoV-2.

37 Results: Drying for two hours did not have a major impact on the infectivity of SARS-CoV-2,  
38 indicating that exhaled virus in droplets or aerosols stays infectious on surfaces at least for a  
39 certain amount of time. Short exposure of high titer surface dried virus ( $3\text{-}5 \times 10^6$  IU/ml) with  
40 UV-C light ( $16 \text{ mJ/cm}^2$ ) resulted in a total inactivation of SARS-CoV-2. Dose-dependency  
41 experiments revealed that  $3.5 \text{ mJ/cm}^2$  were still effective to achieve a  $> 6$ -log reduction in viral  
42 titers whereas  $1.75 \text{ mJ/cm}^2$  lowered infectivity only by one order of magnitude.

43 Conclusions: Our results demonstrate that SARS-CoV-2 is rapidly inactivated by relatively low  
44 doses of UV-C irradiation. Furthermore, the data reveal that the relationship between UV-C  
45 dose and log-viral titer reduction of surface residing SARS-CoV-2 is non-linear. In the context  
46 of UV-C-based technologies used to disinfect surfaces, our findings emphasize the necessity  
47 to assure sufficient and complete exposure of all relevant areas by integrated UV-C doses of  
48 at least  $3.5 \text{ mJ/cm}^2$  at 254 nm. Altogether, UV-C treatment is an effective non-chemical  
49 possibility to decontaminate surfaces from high-titer infectious SARS-CoV-2.

50

51

52

53

54

55

56

## 57 **Introduction**

58 SARS-CoV-2 has spread globally and there is an urgent need for rapid, highly efficient,  
59 environmentally friendly, and non-chemical disinfection procedures. Application of UV-C light  
60 is an established technology for decontamination of surfaces and aerosols (1-3). This  
61 procedure has proven effective to inactivate SARS-CoV-1 (4-6), several other enveloped and  
62 non-enveloped viruses as well as bacteria (7). UV-C-based disinfection could be applied in  
63 operating rooms and healthcare facilities but also prove useful in the business sector, where  
64 there is the necessity to sterilize surfaces being frequently encountered by multiple different  
65 individuals. Some examples also discussed in the context of public health are escalators, public  
66 transportation, rental cars, door handles and waiting rooms. Recently, it has also been shown  
67 that SARS-CoV-2 is sensitive to inactivation by UV-C irradiation (8-12). However, the  
68 aforementioned studies used high UV-C doses from 108 mJ/cm<sup>2</sup> to more than 1 J/cm<sup>2</sup> at  
69 exposure times from 50 seconds to several minutes necessary for total inactivation of SARS-  
70 CoV-2 (10-12). These parameters are in a range complicating efficient application of UV-based  
71 methods to be employed for large-scale decontamination of surfaces and aerosols. Others  
72 used innovative 222 nm or 280 nm UV-C LED technologies (8, 9) which are not yet  
73 implemented in most established 254 nm UV-C-based decontamination devices and needed  
74 relatively high doses of UV-C irradiation for inactivation, too. Another recent study by the Boston  
75 University established 254 nm UV-C dose-dependency inactivation kinetics of SARS-CoV-2  
76 and reported doses necessary for complete sterilization of dry and wet virus preparations  
77 between 4 s and 9 s at 0.85 mW/cm<sup>2</sup> in a test box (13). While this data is promising, a limitation  
78 was the study design in a test box and relatively low viral titers used, just allowing to conclude  
79 2- to 3-log titer reductions by the treatment. Overall, the exact knowledge about dose-  
80 dependent inactivation kinetics is essential to design UV-C-based decontamination procedures  
81 that allow firm disinfection of SARS-CoV-2.

82 We hence conducted an approach simulating the inactivation of dried surface residing high-  
83 titer infectious SARS-CoV-2 by two mobile handheld UV-C emitting devices and an UV-C box  
84 designed to decontaminate medium-size objects. We asked the question of whether short

85 exposure of SARS-CoV-2 to UV-C irradiation is sufficient to reduce viral infectivity and which  
86 UV-C doses are necessary to achieve an at least 6-log reduction in viral titers.

87

## 88 **Material and Methods**

89 **Cell culture.** Caco-2 (Human Colorectal adenocarcinoma) cells were cultured at 37 °C with  
90 5% CO<sub>2</sub> in DMEM (Dulbecco's Modified Eagle Medium) containing 10% FCS, with 2 mM L-  
91 glutamine, 100 µg/ml penicillin-streptomycin and 1% NEAA (Non-Essential Amino Acid).

92 **Viruses.** The recombinant SARS-CoV-2 expressing mNeonGreen (icSARS-CoV-2-mNG) (14)  
93 was obtained from the World Reference Center for Emerging Viruses and Arboviruses  
94 (WRCEVA) at the UTMB (University of Texas Medical Branch). To generate icSARS-CoV-2-  
95 mNG stocks, 200,000 Caco-2 cells were infected with 50 µl of virus stock in a 6-well plate, the  
96 supernatant was harvested 48 hpi, centrifuged, and stored at -80°C. For MOI (Multiplicity of  
97 infection) determination, a titration using serial dilutions of the virus stock was conducted. The  
98 number of infectious virus particles per ml was calculated as the  $(MOI \times \text{cell number}) / (\text{infection}$   
99  $\text{volume})$ , where  $MOI = -\ln(1 - \text{infection rate})$ .

100 **UV-C light inactivation treatment.** 35 µl of virus stock, corresponding to  $\sim 4 \cdot 10^6$  infectious  
101 units (IU) of icSARS-CoV-2-mNG were spotted (in triplicates) in 6-well plates and dried for two  
102 hours at RT. This setup was chosen to mimic the situation in which an infected person exhales  
103 droplets that dry on surfaces and potentially stay infectious and hazardous over a prolonged  
104 period of time. 6-well plates spotted with dried virus were treated with UV-C-light (254 nm)  
105 using the Soluva® pro UV Disinfection Chamber (Heraeus) for 60 seconds or the Soluva®  
106 Zone HP Disinfection Handheld (Heraeus) for 2 seconds in a fix regime at 5 and 20 cm plate  
107 distance. In addition, a moving regime using a slow (3.75 cm/s) and fast (12 cm/s) speed at 20  
108 cm distance was tested. Additionally, we employed a 2<sup>nd</sup> generation Disinfection Handheld  
109 Soluva® Zone H (Heraeus) which is less powerful than the Soluva® pro UV but works  
110 autonomously with a rechargeable battery. See the spectrum of UV-C lamps employed in these  
111 devices in Supplemental Image 1. The lower UV-C intensity emitted by this device allowed us  
112 to perform a dose-dependency experiment exposing dried virus with different UV-C intensities.

113 The time dependent UV-C intensity emitted by the Soluva® Zone H at various distances is  
114 detailed and depicted in Supplemental Image 2. UV exposure was carried out after 10 minutes  
115 of pre-heating the device at a distance of 50 cm for 20 s, 10 s, 5 s, 2.5 s, 20 s + 97 % UV-filter,  
116 10 s + 97 % UV-filter corresponding to 14 mJ/cm<sup>2</sup>, 7 mJ/cm<sup>2</sup>, 3.5 mJ/cm<sup>2</sup>, 1.75 mJ/cm<sup>2</sup>, 0.42  
117 mJ/cm<sup>2</sup> and 0.21 mJ/cm<sup>2</sup>. These values are based on an on-site and parallel measurement of  
118 UV-C intensity emitted by the device via an UV-C dosimeter (Dr. Gröbel UV electronic GmbH),  
119 which corresponds to 0.7 mJ/cm<sup>2</sup> when the UV-C light is applied at 50 cm distance, which fits  
120 quite well to the previously company measured value of 0.84 mJ/cm<sup>2</sup> (Supplemental Image 2).  
121 As control, 6-well plates were spotted with the virus and dried, but not UV-treated. After UV-  
122 treatment, the spotted virus was reconstituted using 1 ml of infection media (culture media with  
123 5% FCS) and viral titers determined as explained below. As additional control, 35 µl of the  
124 original virus stock were diluted to 1 ml with infection media and used as virus stock infection  
125 control. All UV-treatments were done at RT.

126 **Evaluation of UV-treatment.** For infection experiments and titer determination,  $1 \times 10^4$  Caco-  
127 2 cells/well were seeded in 96-well plates the day before infection. Cells were incubated with  
128 the SARS-CoV-2 strain icSARS-CoV-2-mNG at a MOI=1.1 (stock) or the UV-treated and  
129 reconstituted virus in serial two-fold dilutions from 1:200 up to 1:51200 and in one experiment  
130 up to 1:102400. 48 hpi cells were fixed with 2% PFA (Paraformaldehyde) and stained with  
131 Hoechst33342 (1 µg/ml final concentration) for 10 minutes at 37°C. The staining solution was  
132 removed and exchanged for PBS (Phosphate-buffered saline). For quantification of infection  
133 rates, images were taken with the Cytation3 (Biotek) and Hoechst+ and mNG+ cells were  
134 automatically counted by the Gen5 Software (Biotek). Viral titers (number of infectious virus  
135 particles per ml) were calculated as the  $(MOI \times \text{cell number})/(\text{infection volume})$ , where  $MOI =$   
136  $-\ln(1 - \text{infection rate})$ . Infection rates lower than 0.01 were used as a cutoff and set to 0 in order  
137 to avoid false positive calculations.

138 **Software and statistical analysis.** Experiments were repeated two to four times each using  
139 duplicate or triplicate infections. GraphPad Prism 8.0 was used for statistical analyses and to  
140 generate graphs, as well as CorelDrawX7. Other software used included Gen5 v.3.10.

## 141 **Results**

### 142 **Inactivation of high-titer SARS-CoV-2 by UV-C treatment**

143 We set up an experimental approach to evaluate the effect of UV-C treatment on the infectivity  
144 of SARS-CoV-2. Simulating the situation that exhaled droplets or aerosols from infected  
145 individuals contaminate surfaces, we produced a high-titer SARS-CoV-2 infectious stock and  
146 dried 35 $\mu$ l of this stock corresponding to  $\sim 4\text{-}6 \times 10^6$  IU/ml in each well of a 6-well plate. The  
147 plates were then either non-treated or exposed to five UV-C regimens at 254 nm (Fig. 1a).  
148 These include inactivation for 60 s in a box designed to disinfect medium-size objects, 2 s  
149 exposure at 5 cm or 20 cm distance with a handheld UV-C disinfection device and an approach  
150 simulating decontamination of surfaces via the handheld UV-C device (Zone HP). For this, we  
151 performed slow and fast-moving at a distance of  $\sim 20$  cm, with “slow” corresponding to a speed  
152 of  $\sim 3.75$  cm/s (supplemental movie 1) and “fast” at  $\sim 12$  cm/s (supplemental movie 2). UV-C  
153 irradiance (254 nm) in the box with an exposure time of 60 seconds corresponds to an  
154 irradiation dose of 600 mJ/cm<sup>2</sup>; for the handheld (HH) at 5 cm the UV-C dose at two second  
155 irradiation time is 80 mJ/cm<sup>2</sup> and at 20 cm is 16 mJ/cm<sup>2</sup>. From the speed of the “slow” and “fast”  
156 moving regimens we calculate a UV-C dose of 2.13 mJ/cm<sup>2</sup> (slow) and 0.66 mJ/cm<sup>2</sup> (fast),  
157 assuming a focused intensity beam. However, taking into consideration the UV-C light  
158 distribution underneath the handheld device the integrated UV-C dose accumulates to 20  
159 mJ/cm<sup>2</sup> for the fast regimen.

160 Subsequently, dried virus was reconstituted with 1 mL infection media and used to inoculate  
161 naïve Caco-2 cells at serial dilutions to calculate viral titers. Taking advantage of an infectious  
162 SARS-CoV-2 strain expressing the chromophore mNeonGreen (14), we quantified infected  
163 (mNG+) and total (Hoechst+) cells by single-cell counting with an imaging multiplate reader. Of  
164 note, even short UV-C treatment of the dried virus in the context of the moving “fast” regimen  
165 completely inactivated SARS-CoV-2, as no infected cells were detected based on fluorescence  
166 protein expression (Fig. 1b). Titration of two-fold series dilutions of the UV-treated and non-  
167 treated control samples, as well as the freshly thawed strain as reference, revealed that (i)  
168 drying for two hours does not have a major impact on the infectivity of SARS-CoV-2 and (ii) all

169 five UV-C treatment regimens effectively inactivate SARS-CoV-2 (Fig. 1c). Calculation of viral  
170 titers based on the titration of the reconstituted virus stocks revealed a loss of titer due to drying  
171 from  $\sim 4 \times 10^6$  to  $\sim 3 \times 10^6$  IU/ml in this set of experiments and effective 6-log titer reduction of  
172 SARS-CoV-2 by all employed UV-C treatment regimens down to 16 mJ/cm<sup>2</sup> (Fig. 1d).

173

#### 174 **Dose-dependent UV-C mediated inactivation of SARS-CoV-2**

175 We next aimed to determine the UV-C doses at 254 nm sufficient to achieve complete  
176 disinfection respectively an at least 6-log reduction in viral titers. For this, we employed a  
177 battery-driven UV-C handheld device (Zone H) emitting 254 nm UV-C light at 0.7 mJ/cm<sup>2</sup> at a  
178 distance of 50 cm. This allowed us to treat surface-dried SARS-CoV-2 with different UV-C  
179 doses by variation of the exposure time and additional use of a 97 % UV-C filter. In agreement  
180 with our previous measurement, drying for 2 hours did not significantly affect SARS-CoV-2  
181 infectivity and relatively high doses of 254 nm UV-C treatment (14 mJ/cm<sup>2</sup>) inactivated SARS-  
182 CoV-2 (Fig. 2a exemplary images at 1:200 dilution and Fig. 2b quantitative analyses).  
183 Furthermore, there was a dose-dependent reduction in SARS-CoV-2 infectivity with total  
184 inactivation down to 3.5 mJ/cm<sup>2</sup> while partial inactivation was still observed at 1.75 mJ/cm<sup>2</sup> (Fig.  
185 2a and b). Careful evaluation of viral titers post UV-C exposure revealed that > 6-log titer  
186 reduction was achieved by 3.5 mJ/cm<sup>2</sup> 254 nm UV-C treatment (Fig. 2c). Of note, mean titers  
187 were only reduced by slightly more than one order of magnitude from  $5.04 \times 10^6$  IU/ml of the  
188 dried and reconstituted SARS-CoV-2 to  $3.5 \times 10^5$  IU/ml when the virus was exposed to 1.75  
189 mJ/cm<sup>2</sup>, corresponding to 93 % inactivation. Therefore, the relationship between inactivation of  
190 surface dried SARS-CoV-2 and UV-C treatment is non-linear, at least in our system and 3.5  
191 mJ/cm<sup>2</sup> are necessary to achieve a 6-log titer reduction.

192

#### 193 **Discussion**

194 Disinfection of surfaces and aerosols by UV-C irradiation is an established, safe and non-  
195 chemical procedure used for the environmental control of pathogens (1-3, 15). UV-C treatment  
196 has proven effective against several viruses including SARS-CoV-1 (4-6) and other

197 coronaviruses i.e. Canine coronaviruses (16). Hence, as recently demonstrated by others (8-  
198 13) and now confirmed by our study it was expected that SARS-CoV-2 is permissive for  
199 inactivation by UV-C treatment. One critical question is the suitability of this technology in a  
200 setting in which the exposure time of surfaces or aerosols should be kept as short as possible  
201 to allow for a realistic application, for example in rooms that need to be used frequently as  
202 operating rooms or lecture halls. In such a setting, we assume that the virus is exhaled from an  
203 infected person by droplets and aerosols, dries on surfaces and hence represents a threat to  
204 non-infected individuals. We mimicked such a situation and first evaluated if surface dried  
205 SARS-CoV-2 is infectious. Drying for two hours, in agreement with previous work (13, 17), did  
206 not result in a significant reduction of viral infectivity indicating smear-infections could indeed  
207 play a role in the transmission of SARS-CoV-2 (Fig. 1). On the other hand, our virus-  
208 preparations are dried in cell culture pH-buffered medium containing FCS, which might stabilize  
209 viral particles. Hence, even though this is not the scope of the current study, it will be interesting  
210 to evaluate if longer drying or virus-preparations in PBS affect the environmental stability of  
211 SARS-CoV-2. Irrespective of the latter, UV-C-exposure of dried high-titer SARS-CoV-2  
212 preparations containing  $\sim 3\text{-}5 \times 10^6$  IU/ml resulted in a complete reduction of viral infectivity (Fig.  
213 1). In this context, it is noteworthy that we achieved a 6-log virus-titer reduction in a setting  
214 simulating surface disinfection with a moving handheld device. With the “fast”-moving protocol  
215 (see supplemental video 1) we were exposing surfaces at a distance of 20 cm with a speed of  
216 12.5 cm/s resulting in a calculated integrated UV-C dose of 20 mJ/cm<sup>2</sup> at 254 nm. This is  
217 substantially less than the previously reported 1048 mJ/cm<sup>2</sup> necessary to achieve a 6-log  
218 reduction in virus titers when exposing aqueous SARS-CoV-2 to UV-C (10). In another study,  
219 using a 222 nm UV-LED source, 3 mJ/cm<sup>2</sup> lead to a 2.51-log (99.7 %) reduction of infectious  
220 SARS-CoV-2 when irradiating for 30 s, however inactivation did not increase with extended  
221 irradiation regimens up to 300 s (9). In addition, 20 s deep-ultraviolet treatment at 280 nm  
222 corresponding to a dose of 75 mJ/cm<sup>2</sup> reduced SARS-CoV-2 titer up to 3-logs (8). Finally, Storm  
223 and colleagues reported a 2-log reduction of dried SARS-CoV-2 at 4 s with 0.85 mW/cm<sup>2</sup>  
224 corresponding to 3.4 mJ/cm<sup>2</sup> (13). Of note, this value is highly similar to the dose of 3.5 mJ/cm<sup>2</sup>



225 calculated by us to be sufficient to achieve a > 6-log SARS-CoV-2 titer reduction, when the  
226 virus is in a dried surface residing state (Fig. 2). Comparing these values to other pathogens,  
227 SARS-CoV-2 seems particularly sensitive towards UV-C light. To achieve a 3-log titer  
228 reduction, 75-130 mJ/cm<sup>2</sup> are necessary for adenovirus, 11-28 mJ/cm<sup>2</sup> for poliovirus, and  
229 bacteria as for instance *Bacillus subtilis* require 18-61 mJ/cm<sup>2</sup> (7).

230 Important limitations of UV-C-based disinfection procedures also exist. First and most  
231 importantly, UV-C irradiation is harmful to humans due to the high energy of the germicidal  
232 lamps and exposure of skin or eyes must be avoided. This excludes decontamination of  
233 populated public spaces by UV-C. Furthermore, UV-C does not penetrate surfaces, hence for  
234 efficient disinfection, equal direct irradiation of all surfaces with a sufficient dose has to be  
235 assured. Our work highlights this aspect, as due to the non-linear decay kinetic of the dose-  
236 response relationship 3.5 mJ/cm<sup>2</sup> will totally inactivate high viral titers, whereas a slightly  
237 reduced dose of 1.75 mJ/cm<sup>2</sup> only achieves roughly one-log reduction (Fig. 2c).

238 Apart from that, our study as well as the research done by others (13), emphasizes UV-C-  
239 based disinfection technologies as highly efficient to rapidly sterilize surfaces in different  
240 settings as for instance operating rooms, less-frequently populated areas in healthcare facilities  
241 and public transportation, but also in research facilities. Ideal applications are done in closed  
242 containers, precluding exposure of persons to UV-C radiation, when sterilizing small to  
243 medium-size objects. Another highly relevant aspect is the use of UV-C lamps in air sterilizers  
244 which would have a strong impact on public health and prevention of the public to infectious  
245 aerosols. However, the transferability of our results to viral aerosols, even though they give a  
246 first indicator, might be limited. Virus in aerosols exerts other dynamics and inactivation kinetics  
247 might differ. Hence, it is highly relevant and warranted to conduct studies to carefully determine  
248 UV-C doses necessary and sufficient for inactivation of SARS-CoV-2 in aerosols.

249 Altogether, we establish the effectiveness of UV-C treatment against SARS-CoV-2 in a setting  
250 designed to simulate close-to-reality conditions of decontamination. The easy, rapid, chemical-  
251 free, and high efficacy of UV-C treatment to inactivate SARS-CoV-2 demonstrates the  
252 applicability of this technology in a broad range of possible settings.

253 **Author contributions**

254 NR and MS designed the experiments; NR performed the experiments with support from RB;  
255 NR, RB and MS analyzed the data; NR and MS drafted the figures and wrote the manuscript;  
256 MS developed the manuscript to its final form; MS planned and supervised the study; all authors  
257 read, edited, and approved the final manuscript.

258

259 **Acknowledgements**

260 We are thankful to Jan Winderlich, Jasmin Zahn, Christoph Söller, und Anika Hofmann  
261 (Heraeus) for fruitful discussions and for providing UV-C lamp spectra and UV-C dose emission  
262 measurements on the Soluva® Zone H.

263

264 **Conflict of interest**

265 The authors declare no conflict of interest

266

267 **Ethical statement**

268 This study does not include any data obtained with primary patient cells or data. Hence, there  
269 was no necessity to obtain ethical approval by the internal review board.

270

271 **Funding**

272 This work was supported by a grant to MS from the MWK Baden-Württemberg (Project  
273 “Testaerosole und –verfahren für Wirksamkeitsuntersuchungen von  
274 Luftreinigungstechnologien gegenüber Sars-CoV-2”) as well as by basic funding provided to  
275 MS by the University Hospital Tübingen. Heraeus provided the Soluva UV-disinfection chamber  
276 and the UV-handheld disinfection devices, the UV-filters and the UV-dosimeter as well  
277 contributed funding for consumables. The funders had no role in study design, data analysis or  
278 decision to publish the data.

279

280

281 **References**

- 282 1. Walker CM, Ko G. Effect of ultraviolet germicidal irradiation on viral aerosols. *Environ*  
283 *Sci Technol.* 2007;41(15):5460-5.
- 284 2. Qureshi Z, Yassin MH. Role of ultraviolet (UV) disinfection in infection control and  
285 environmental cleaning. *Infect Disord Drug Targets.* 2013;13(3):191-5.
- 286 3. Simmons S, Dale C, Holt J, Velasquez K, Stibich M. Role of Ultraviolet Disinfection in  
287 the Prevention of Surgical Site Infections. *Adv Exp Med Biol.* 2017;996:255-66.
- 288 4. Duan SM, Zhao XS, Wen RF, Huang JJ, Pi GH, Zhang SX, et al. Stability of SARS  
289 coronavirus in human specimens and environment and its sensitivity to heating and UV  
290 irradiation. *Biomed Environ Sci.* 2003;16(3):246-55.
- 291 5. Tsunetsugu-Yokota Y. Large-scale preparation of UV-inactivated SARS coronavirus  
292 virions for vaccine antigen. *Methods Mol Biol.* 2008;454:119-26.
- 293 6. Darnell ME, Subbarao K, Feinstone SM, Taylor DR. Inactivation of the coronavirus  
294 that induces severe acute respiratory syndrome, SARS-CoV. *J Virol Methods.*  
295 2004;121(1):85-91.
- 296 7. Malayeri AM, Madjid; Cairns, Bill; Bolton, James. Fluence (UV Dose) Required to  
297 Achieve Incremental Log Inactivation of Bacteria, Protozoa, Viruses and Algae. *IUVA News*  
298 2016;18. 4-6.
- 299 8. Inagaki H, Saito A, Sugiyama H, Okabayashi T, Fujimoto S. Rapid inactivation of  
300 SARS-CoV-2 with deep-UV LED irradiation. *Emerg Microbes Infect.* 2020;9(1):1744-7.
- 301 9. Kitagawa H, Nomura T, Nazmul T, Omori K, Shigemoto N, Sakaguchi T, et al.  
302 Effectiveness of 222-nm ultraviolet light on disinfecting SARS-CoV-2 surface contamination.  
303 *Am J Infect Control.* 2020.
- 304 10. Heilingloh CS, Aufderhorst UW, Schipper L, Dittmer U, Witzke O, Yang D, et al.  
305 Susceptibility of SARS-CoV-2 to UV irradiation. *Am J Infect Control.* 2020.
- 306 11. Criscuolo E, Diotti RA, Ferrarese R, Alippi C, Viscardi G, Signorelli C, et al. Fast  
307 inactivation of SARS-CoV-2 by UV-C and ozone exposure on different materials. *Emerg*  
308 *Microbes Infect.* 2021;10(1):206-10.
- 309 12. Sabino CP, Sellera FP, Sales-Medina DF, Machado RRG, Durigon EL, Freitas-Junior  
310 LH, et al. UV-C (254 nm) lethal doses for SARS-CoV-2. *Photodiagnosis Photodyn Ther.*  
311 2020;32:101995.
- 312 13. Storm N, McKay LGA, Downs SN, Johnson RI, Birru D, de Samber M, et al. Rapid  
313 and complete inactivation of SARS-CoV-2 by ultraviolet-C irradiation. *Sci Rep.*  
314 2020;10(1):22421.
- 315 14. Xie X, Muruato A, Lokugamage KG, Narayanan K, Zhang X, Zou J, et al. An  
316 Infectious cDNA Clone of SARS-CoV-2. *Cell Host Microbe.* 2020;27(5):841-8 e3.
- 317 15. Weber DJ, Kanamori H, Rutala WA. 'No touch' technologies for environmental  
318 decontamination: focus on ultraviolet devices and hydrogen peroxide systems. *Curr Opin*  
319 *Infect Dis.* 2016;29(4):424-31.
- 320 16. Pratelli A. Canine coronavirus inactivation with physical and chemical agents. *Vet J.*  
321 2008;177(1):71-9.
- 322 17. van Doremalen N, Bushmaker T, Morris DH, Holbrook MG, Gamble A, Williamson  
323 BN, et al. Aerosol and Surface Stability of SARS-CoV-2 as Compared with SARS-CoV-1. *N*  
324 *Engl J Med.* 2020;382(16):1564-7.

325

326

327

328

329

330 **Figures and Legends**

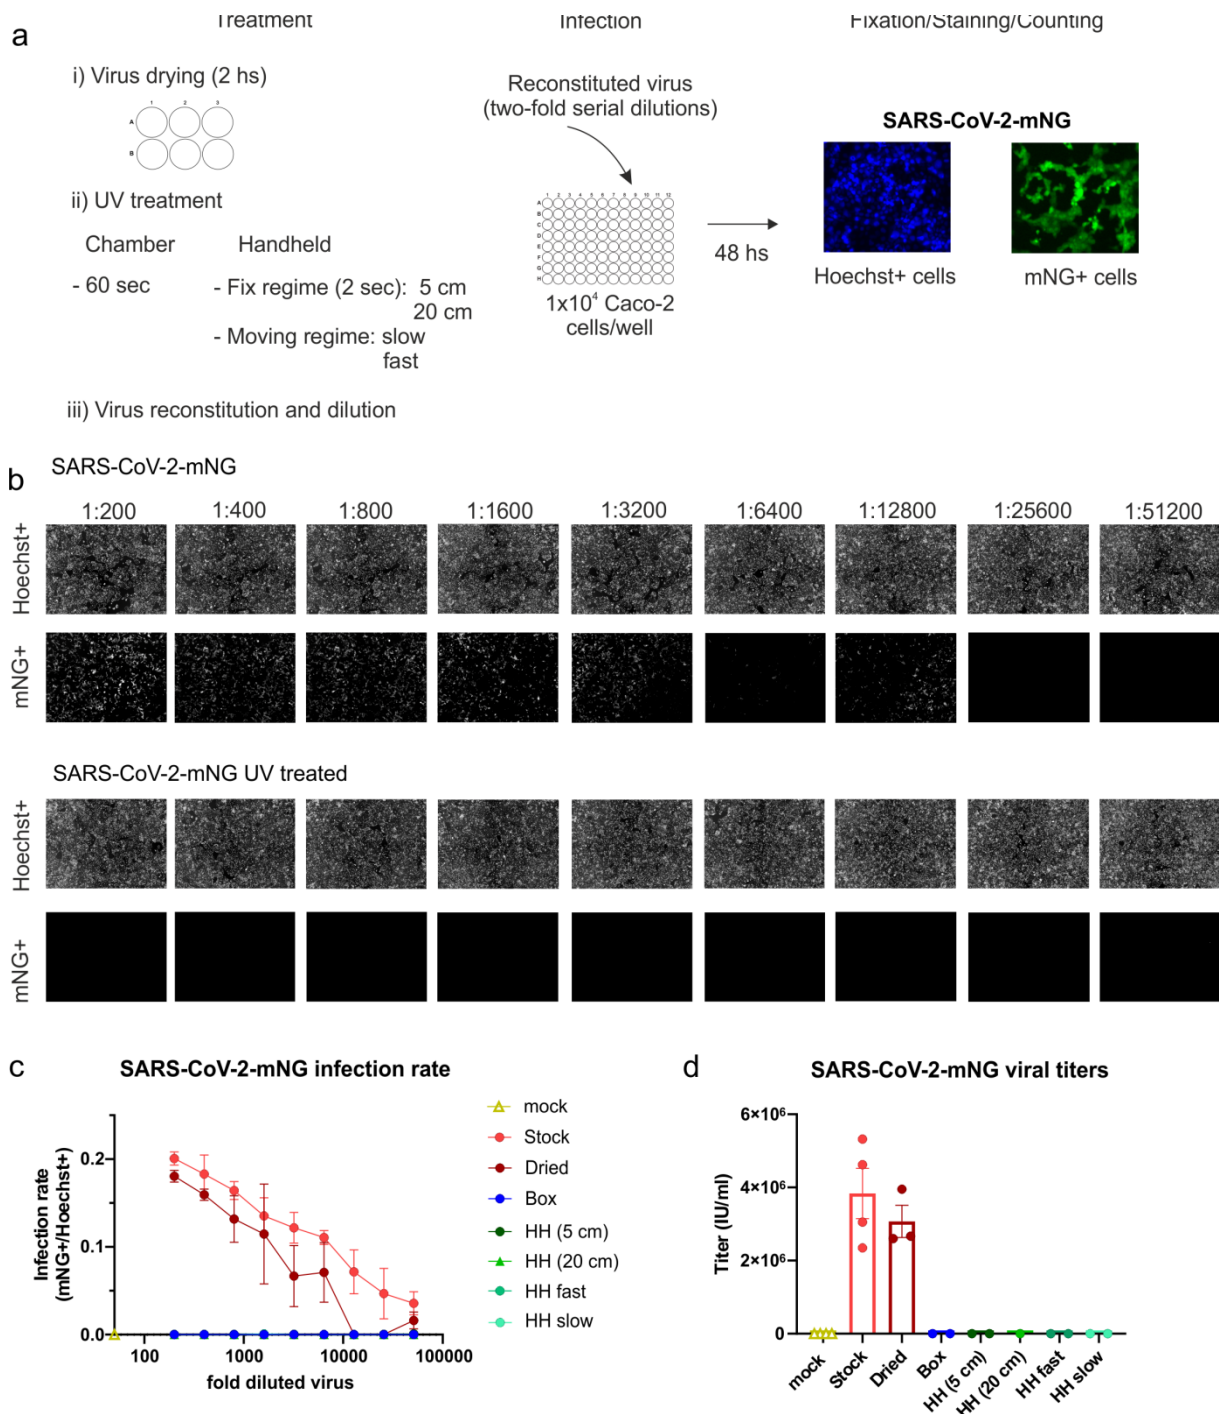

331

332 **Figure 1. Inactivation of SARS-CoV-2 by UV-C light treatment.** (a) Experimental layout of

333 the different UV-treatments and the infection assay employed using the green-fluorescent virus

334 SARS-CoV-2.mNG. (b) Primary data showing the results of the infection assay using the non-

335 treated stock virus as a positive control and the UV-treated virus (HH, fast-moving regime). In

336 the upper row, the total amount of cells for each well of the two-fold serial dilution of virus is

337 shown as Hoechst+. In the lower, infected cells are visualized indicated as mNG+ cells. (c)

338 Infection rate curves for UV-irradiated SARS-CoV-2-mNG using different UV-treatments. The  
339 graph shows the infection rate at each two-fold serial dilution, calculated as the number of  
340 infected cells (mNG+) over the total number of cells (Hoechst+) for the non-treated viral stock  
341 (n=4), dried viral stock (n=3), and dried and UV-irradiated virus using five different UV-  
342 treatments (n=2). Data are presented as mean +/- SEM of the number of biological replicates  
343 indicated above. (d) SARS-CoV-2-mNG viral titers after UV-treatment. The graph shows the  
344 viral titers calculated in IU/mL for the mock-infected, non-treated, and dried stock as well as  
345 the dried and UV-irradiated virus under the different treatments. The number of biological  
346 replicates (n=2-4) is directly plotted and indicated in 1c. Data are presented as mean +/- SEM.

347

348

349

350

351

352

353

354

355

356

357

358

359

360

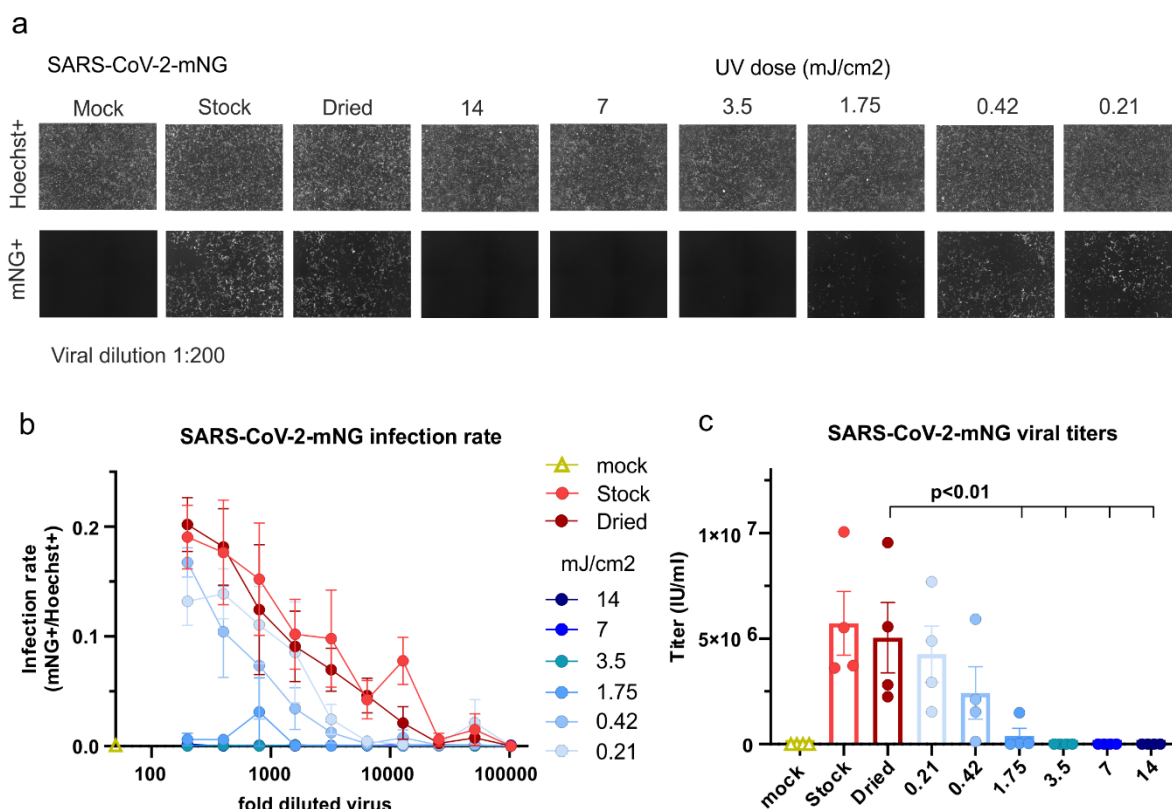

361

362 **Figure 2. UV-C dose required for SARS-CoV-2 inactivation.** (a) Primary data showing the

363 results of the infection assay using mock-infected cells, non-treated stock virus as a positive

364 control, and virus treated with the 6 UV-C doses as indicated. In the upper row, the total amount

365 of cells is shown as Hoechst+. In the lower, infected cells at a viral dilution of 1:200 are

366 visualized indicated as mNG+ cells. (b) Infection rate curves for UV-irradiated SARS-CoV-2-

367 mNG using different UV-doses. The graph shows the infection rate at each two-fold serial

368 dilution, calculated as the number of infected cells (mNG+) over the total number of cells

369 (Hoechst+) for the non-treated viral stock, dried viral stock, and dried and UV-irradiated virus

370 using different UV-C-doses (n=4). Data are presented as mean +/- SEM of the number of

371 biological replicates indicated above. (c) SARS-CoV-2-mNG viral titers after UV-treatment. The

372 graph shows the viral titers calculated in IU/mL for the mock-infected, non-treated, and dried

373 stock as well as the dried and UV-irradiated virus under the different UV-C-doses. The number

374 of biological replicates is n=4. Data are presented as mean +/- SEM. For analysis of statistical

375 significance, we used a one-way ANOVA with multiple comparison and Fishers LSD-test.

376

377 **Supplemental Image 1. Spectrum of the UV-C lamps used.**

378

379 **Supplemental Image 2. UV-C emission at 254 nm of the Soluva® Zone H at different**  
380 **distances and time points.**

381

382 **Supplemental Movie 1. UV-irradiation using the Handheld device, slow-moving regime.**

383 SARS-CoV-2-mNG was spotted in a 6-well plate, dried for two hs and UV-irradiated as shown  
384 in the video. Speed is calculated at approx. 3.75 cm/s.

385

386 **Supplemental Movie 2. UV-irradiation using the Handheld device, fast-moving regime.**

387 SARS-CoV-2-mNG was spotted in a 6-well plate, dried for two hs and UV-irradiated as shown  
388 in the video. Speed is calculated at approx. 12.5 cm/s.

389

390
