1 **Rapid and efficient inactivation of surface dried SARS-CoV-2 by UV-C**  
2 **irradiation**

3

4 **Natalia Ruetalo<sup>1</sup>, Ramona Businger<sup>1</sup>, Michael Schindler<sup>1\*</sup>**

5 <sup>1</sup>Institute for Medical Virology and Epidemiology of Viral Diseases, University Hospital  
6 Tübingen, Tübingen, Germany

7

8

9

10

11

12

13

14

15

16

17 \*Correspondence should be addressed to:

18 Michael Schindler, [michael.schindler@med.uni-tuebingen.de](mailto:michael.schindler@med.uni-tuebingen.de)

19

20

21

22

23

24

25

26

27

28

29 **Abstract**

30 The SARS-CoV-2 pandemic urges for cheap, reliable and rapid technologies for disinfection  
31 and decontamination. We here evaluated the efficiency of UV-C irradiation to inactivate  
32 surface dried SARS-CoV-2. Drying for two hours did not have a major impact on the infectivity  
33 of SARS-CoV-2, indicating that exhaled virus in droplets or aerosols stays infectious on  
34 surfaces at least for a certain amount of time. Strikingly, short exposure of high titer surface  
35 dried virus ( $3 \times 10^6$  IU/ml) with UV-C light ( $16 \text{ mJ/cm}^2$ ) resulted in a total reduction of SARS-  
36 CoV-2 infectivity. Together, our results demonstrate that SARS-CoV-2 is rapidly inactivated  
37 by relatively low doses of UV-C irradiation. Hence, UV-C treatment is an effective non-  
38 chemical possibility to decontaminate surfaces from high-titer infectious SARS-CoV-2.

39

40

41

42

43

44

45

46

47

48

49

50

51

52

53

54

55

56

## 57 **Introduction**

58 SARS-CoV-2 has spread globally and there is an urgent need for rapid, highly efficient,  
59 environmentally friendly, and non-chemical disinfection procedures. Application of UV-C light  
60 is an established technology for decontamination of surfaces and aerosols (1-3). This  
61 procedure has proven effective to inactivate SARS-CoV-1 (4-6), several other enveloped and  
62 non-enveloped viruses as well as bacteria (7). Recently, it has also been shown that SARS-  
63 CoV-2 is sensitive to inactivation by UV-C irradiation (8-10). However, doses and exposure  
64 times necessary for total inactivation of SARS-CoV-2 were in a range precluding efficient  
65 application of UV-based methods to be employed for large-scale decontamination of surfaces  
66 and aerosols (10). We hence conducted a “real-life” application approach simulating the  
67 inactivation of dried surface residing infectious SARS-CoV-2 by a mobile handheld UV-C  
68 emitting device and an UV-C box designed to decontaminate medium-size objects. Our data  
69 shows that surface dried SARS-CoV-2 retains infectivity for at least two hours. Short  
70 exposure of high-titer surface dried SARS-CoV-2 to UV-C light lead to a total reduction of  
71 infectivity. Hence, UV-C irradiation is a rapid and cost-effective technology to decontaminate  
72 surfaces from high-titer SARS-CoV-2.

73

74

75

## 76 **Material and Methods**

77 **Cell culture.** Caco-2 (Human Colorectal adenocarcinoma) cells were cultured at 37 °C with  
78 5% CO<sub>2</sub> in DMEM containing 10% FCS, with 2 mM l-glutamine, 100 µg/ml penicillin-  
79 streptomycin and 1% NEAA.

80 **Viruses.** The recombinant SCoV2 expressing mNeonGreen (icSARS-CoV-2-mNG) (11) was  
81 obtained from the World Reference Center for Emerging Viruses and Arboviruses (WRCEVA)  
82 at the UTMB (University of Texas Medical Branch). To generate icSARS-CoV-2-mNG stocks,  
83 200,000 Caco-2 cells were infected with 50 µl of virus stock in a 6-well plate, the supernatant  
84 was harvested 48 hpi, centrifuged, and stored at -80°C.

85 For MOI determination, a titration using serial dilutions of the virus stock was conducted. The  
86 number of infectious virus particles per ml was calculated as the  $(\text{MOI} \times \text{cell}$   
87  $\text{number})/(\text{infection volume})$ , where  $\text{MOI} = -\ln(1 - \text{infection rate})$ .

88 **UV-C light inactivation treatment.** 35  $\mu\text{L}$  of virus stock, corresponding to  $\sim 4 \times 10^6$  infectious  
89 units (IU) of icSARS-CoV-2-mNG were spotted (in triplicates) in 6-well plates and dried for  
90 two hours at RT. 6-well plates spotted with dried virus were treated with UV-C-light using the  
91 Soluva® pro UV Disinfection Chamber (Heraeus) for 60 seconds or the Soluva® pro UV  
92 Disinfection Handheld (Heraeus) for 2 seconds in a fix regime at 5 and 20 cm plate distance.  
93 In addition, a moving regime using a slow (3.75 cm/s) and fast (12 cm/s) speed at 20 cm  
94 distance was tested. As control, 6-well plates were spotted with the virus and dried, but not  
95 UV-treated. After UV-treatment, the spotted virus was reconstituted using 1 mL of infection  
96 media (culture media with 5% FCS). As control, 35  $\mu\text{L}$  of the original virus stock were diluted  
97 to 1 ml with infection media and used as virus stock infection control.

98 **Evaluation of UV-treatment.** For infection experiments,  $1 \times 10^4$  Caco-2 cells/well were  
99 seeded in 96-well plates the day before infection. Cells were incubated with the SARS-CoV-2  
100 strain icSARS-CoV-2-mNG at a  $\text{MOI}=1.1$  (stock) or the UV-treated and reconstituted virus in  
101 serial two-fold dilutions from 1:200 up to 1:51200. 48 hpi cells were fixed with 2% PFA and  
102 stained with Hoechst33342 (1  $\mu\text{g}/\text{mL}$  final concentration) for 10 minutes at  $37^\circ\text{C}$ . The staining  
103 solution was removed and exchanged for PBS. For quantification of infection rates, images  
104 were taken with the Cytation3 (Biotek) and Hoechst+ and mNG+ cells were automatically  
105 counted by the Gen5 Software (Biotek).

106 Viral titers (number of infectious virus particles per ml) were calculated as the  $(\text{MOI} \times \text{cell}$   
107  $\text{number})/(\text{infection volume})$ , where  $\text{MOI} = -\ln(1 - \text{infection rate})$ . Infection rates lower than  
108 0.01 were used as a cutoff and set to 0 in order to avoid false positive calculations.

109 **Software and statistical analysis.** GraphPad Prism 8.0 was used for statistical analyses  
110 and to generate graphs. Figures were generated with CorelDrawX7. Other software used  
111 included Gen5 v.3.10.

112

## 113 **Results**

114 We set up an experimental approach to evaluate the effect of UV-C treatment on the stability  
115 of SARS-CoV-2. Simulating the situation that exhaled droplets or aerosols from infected  
116 individuals contaminate surfaces, we produced a high-titer SARS-CoV-2 infectious stock and  
117 dried 35 $\mu$ L of this stock corresponding to  $\sim 4 \times 10^6$  IU/ml in each well of a 6-well plate. The  
118 plates were then either non-treated or exposed to five UV-C regimens (Fig. 1a). These  
119 include inactivation for 60 s in a box designed to disinfect medium-size objects, 2 s exposure  
120 at 5 cm or 20 cm distance with a handheld UV-C disinfection device and finally an approach  
121 simulating decontamination of surfaces via the handheld UV-C device. For this, we performed  
122 slow and fast-moving at a distance of  $\sim 20$  cm, with “slow” corresponding to a speed of  $\sim 3.75$   
123 cm/s (supplemental movie 1) and “fast” at  $\sim 12$  cm/s (supplemental movie 2). UV-C irradiance  
124 (254 nm) in the box with an exposure time of 60 seconds corresponds to an irradiation dose  
125 of 800 mJ/cm<sup>2</sup>; for the handheld (HH) at 5 cm the UV-C dose at two second irradiation time is  
126 80 mJ/cm<sup>2</sup> and at 20 cm is 16 mJ/cm<sup>2</sup>. From the speed of the “slow” and “fast” moving  
127 regimens we calculate a UV-C dose of 2.13 mJ/cm<sup>2</sup> (slow) and 0.66 mJ/cm<sup>2</sup> (fast), assuming  
128 a focused intensity beam. However, taking into consideration the UV-C light distribution  
129 underneath the handheld device the integrated UV-C dose accumulates to 20 mJ/cm<sup>2</sup> for the  
130 fast regimen.

131 Subsequently, dried virus was reconstituted with 1 mL infection media and used to inoculate  
132 naïve Caco-2 cells at serial dilutions to calculate viral titers. Taking advantage of an infectious  
133 SARS-CoV-2 strain expressing the chromophore mNeonGreen (11), we quantified infected  
134 (mNG+) and total (Hoechst+) cells by single-cell counting with an imaging multiplate reader.  
135 Of note, even short UV-C treatment of the dried virus in the context of the moving “fast”  
136 regimen completely inactivated SARS-CoV-2, as no infected cells were detected based on  
137 fluorescence protein expression (Fig. 1b). Titration of two-fold series dilutions of the UV-  
138 treated and non-treated control samples, as well as the freshly thawed strain as reference,  
139 revealed that (i) drying for two hours does not have a major impact on the infectivity of SARS-  
140 CoV-2 and (ii) all five UV-C treatment regimens effectively inactivate SARS-CoV-2 (Fig. 1c).

141 Calculation of viral titers based on the titration of the reconstituted virus stocks revealed a  
142 loss of titer due to drying from  $\sim 4 \times 10^6$  to  $\sim 3 \times 10^6$  IU/ml and effective 6-log titer reduction of  
143 SARS-CoV-2 by all employed UV-C treatment regimens (Fig. 1d). Altogether, our data  
144 demonstrate that UV-C regimens that expose high-titer SARS-CoV-2 to doses down to 16  
145 mJ/cm<sup>2</sup> are sufficient to achieve complete inactivation of the virus.

146

## 147 **Discussion**

148 Disinfection of surfaces and aerosols by UV-C irradiation is an established, safe and non-  
149 chemical procedure used for the environmental control of pathogens (1-3, 12). UV-C  
150 treatment has proven effective against several viruses including SARS-CoV-1 (4-6) and other  
151 coronaviruses i.e. Canine coronaviruses (13). Hence, as recently demonstrated by others (8-  
152 10) and now confirmed by our study it was expected that SARS-CoV-2 is permissive for  
153 inactivation by UV-C treatment. One critical question is the suitability of this technology in a  
154 “real-life” setting in which the exposure time of surfaces or aerosols should be kept as short  
155 as possible to allow for a realistic application, for example in rooms that need to be used  
156 frequently as operating rooms or lecture halls. Furthermore, in such a setting, we assume that  
157 the virus is exhaled from an infected person by droplets and aerosols, dries on surfaces and  
158 hence represents a threat to non-infected individuals. We simulated such a situation and first  
159 evaluated if surface dried SARS-CoV-2 is infectious. Drying for two hours, in agreement with  
160 previous work (14), did not result in a significant reduction of viral infectivity indicating smear-  
161 infections could indeed play a role in the transmission of SARS-CoV-2 (Fig. 1). On the other  
162 hand, our virus-preparations are dried in cell culture pH-buffered medium containing FCS,  
163 which might stabilize viral particles. Hence, even though this is not the scope of the current  
164 study, it will be interesting to evaluate if longer drying or virus-preparations in PBS affect the  
165 environmental stability of SARS-CoV-2. Irrespective of the latter, UV-C-exposure of dried  
166 high-titer SARS-CoV-2 preparations containing  $\sim 3 \times 10^6$  IU/ml resulted in a complete  
167 reduction of viral infectivity (Fig. 1). In this context, it is noteworthy that we achieved a 6-log  
168 virus-titer reduction in a setting simulating surface disinfection with a moving handheld device.

169 With the “fast”-moving protocol (see supplemental video 1) we were exposing surfaces at a  
170 distance of 20 cm with a speed of 12.5 cm/s resulting in an calculated integrated UV-C dose  
171 of 20 mJ/cm<sup>2</sup> at 254 nm. This is substantially less than the previously reported 1048 mJ/cm<sup>2</sup>  
172 necessary to achieve a 6-log reduction in virus titers when exposing aqueous SARS-CoV-2 to  
173 UV-C (10). In another study, using a 222 nm UV-LED source, 3 mJ/cm<sup>2</sup> lead to a 2.51-log  
174 (99.7 %) reduction of infectious SARS-CoV-2 when irradiating for 30 s, however inactivation  
175 did not be increase with extended irradiation regimens up to 300 s (9). In addition, 20 s deep-  
176 ultraviolet treatment at 280 nm corresponding to a dose of 75 mJ/cm<sup>2</sup> reduced SARS-CoV-2  
177 titer up to 3-logs (8). Comparing these values to other pathogens, SARS-CoV-2 seems  
178 particularly sensitive towards UV-C light. To achieve a 3-log titer reduction, 75-130 mJ/cm<sup>2</sup>  
179 are necessary for adenovirus, 11-28 mJ/cm<sup>2</sup> for poliovirus, and bacteria as for instance  
180 *Bacillus subtilis* require 18-61 mJ/cm<sup>2</sup> (7). This is in-line with susceptibility of SARS-CoV  
181 towards UV-C in aerosols at 2.6 mJ/cm<sup>2</sup>, whereas adenovirus or MS2-bacteriophages were  
182 resistant to such a treatment (1).

183 Altogether, we establish the effectiveness of UV-C treatment against SARS-CoV-2 in a  
184 setting designed to simulate realistic conditions of decontamination. The easy, rapid,  
185 chemical-free, and high efficacy of UV-C treatment to inactivate SARS-CoV-2 demonstrates  
186 the applicability of this technology in a broad range of possible settings.

187

#### 188 **Author contributions**

189 NR and MS designed the experiments; NR performed the experiments with support from RB;  
190 NR, RB and MS analyzed the data; NR and MS drafted the figures and wrote the manuscript;  
191 MS developed the manuscript to its final form; MS planned and supervised the study; all  
192 authors read, edited, and approved the final manuscript.

193

#### 194 **Conflict of interest**

195 The authors declare no conflict of interest

196

## 197 **Funding**

198 This work was supported by grants to MS from the Baden-Württemberg foundation (BW-  
199 Stiftung), the Deutsche Forschungsgemeinschaft, the MWK Baden-Württemberg as well as  
200 by basic funding provided to MS by the University Hospital Tübingen. Heraeus provided the  
201 Soluva UV-disinfection chamber and the UV-handheld disinfection device and contributed  
202 funding for consumables. The funders had no role in study design, data analysis or decision  
203 to publish the data.

204

## 205 **References**

- 206 1. Walker CM, Ko G. Effect of ultraviolet germicidal irradiation on viral aerosols. *Environ*  
207 *Sci Technol.* 2007;41(15):5460-5.
- 208 2. Qureshi Z, Yassin MH. Role of ultraviolet (UV) disinfection in infection control and  
209 environmental cleaning. *Infect Disord Drug Targets.* 2013;13(3):191-5.
- 210 3. Simmons S, Dale C, Holt J, Velasquez K, Stibich M. Role of Ultraviolet Disinfection in  
211 the Prevention of Surgical Site Infections. *Adv Exp Med Biol.* 2017;996:255-66.
- 212 4. Duan SM, Zhao XS, Wen RF, Huang JJ, Pi GH, Zhang SX, et al. Stability of SARS  
213 coronavirus in human specimens and environment and its sensitivity to heating and UV  
214 irradiation. *Biomed Environ Sci.* 2003;16(3):246-55.
- 215 5. Tsunetsugu-Yokota Y. Large-scale preparation of UV-inactivated SARS coronavirus  
216 virions for vaccine antigen. *Methods Mol Biol.* 2008;454:119-26.
- 217 6. Darnell ME, Subbarao K, Feinstone SM, Taylor DR. Inactivation of the coronavirus  
218 that induces severe acute respiratory syndrome, SARS-CoV. *J Virol Methods.*  
219 2004;121(1):85-91.
- 220 7. Malayeri AM, Madjid; Cairns, Bill; Bolton, James. Fluence (UV Dose) Required to  
221 Achieve Incremental Log Inactivation of Bacteria, Protozoa, Viruses and Algae. *IUVA News*  
222 2016;18. 4-6.
- 223 8. Inagaki H, Saito A, Sugiyama H, Okabayashi T, Fujimoto S. Rapid inactivation of  
224 SARS-CoV-2 with deep-UV LED irradiation. *Emerg Microbes Infect.* 2020;9(1):1744-7.
- 225 9. Kitagawa H, Nomura T, Nazmul T, Omori K, Shigemoto N, Sakaguchi T, et al.  
226 Effectiveness of 222-nm ultraviolet light on disinfecting SARS-CoV-2 surface contamination.  
227 *Am J Infect Control.* 2020.
- 228 10. Heilingloh CS, Aufderhorst UW, Schipper L, Dittmer U, Witzke O, Yang D, et al.  
229 Susceptibility of SARS-CoV-2 to UV irradiation. *Am J Infect Control.* 2020.
- 230 11. Xie X, Muruato A, Lokugamage KG, Narayanan K, Zhang X, Zou J, et al. An  
231 Infectious cDNA Clone of SARS-CoV-2. *Cell Host Microbe.* 2020;27(5):841-8 e3.
- 232 12. Weber DJ, Kanamori H, Rutala WA. 'No touch' technologies for environmental  
233 decontamination: focus on ultraviolet devices and hydrogen peroxide systems. *Curr Opin*  
234 *Infect Dis.* 2016;29(4):424-31.
- 235 13. Pratelli A. Canine coronavirus inactivation with physical and chemical agents. *Vet J.*  
236 2008;177(1):71-9.
- 237 14. van Doremalen N, Bushmaker T, Morris DH, Holbrook MG, Gamble A, Williamson  
238 BN, et al. Aerosol and Surface Stability of SARS-CoV-2 as Compared with SARS-CoV-1. *N*  
239 *Engl J Med.* 2020;382(16):1564-7.

240

## 241 **Figure and Legend**



242

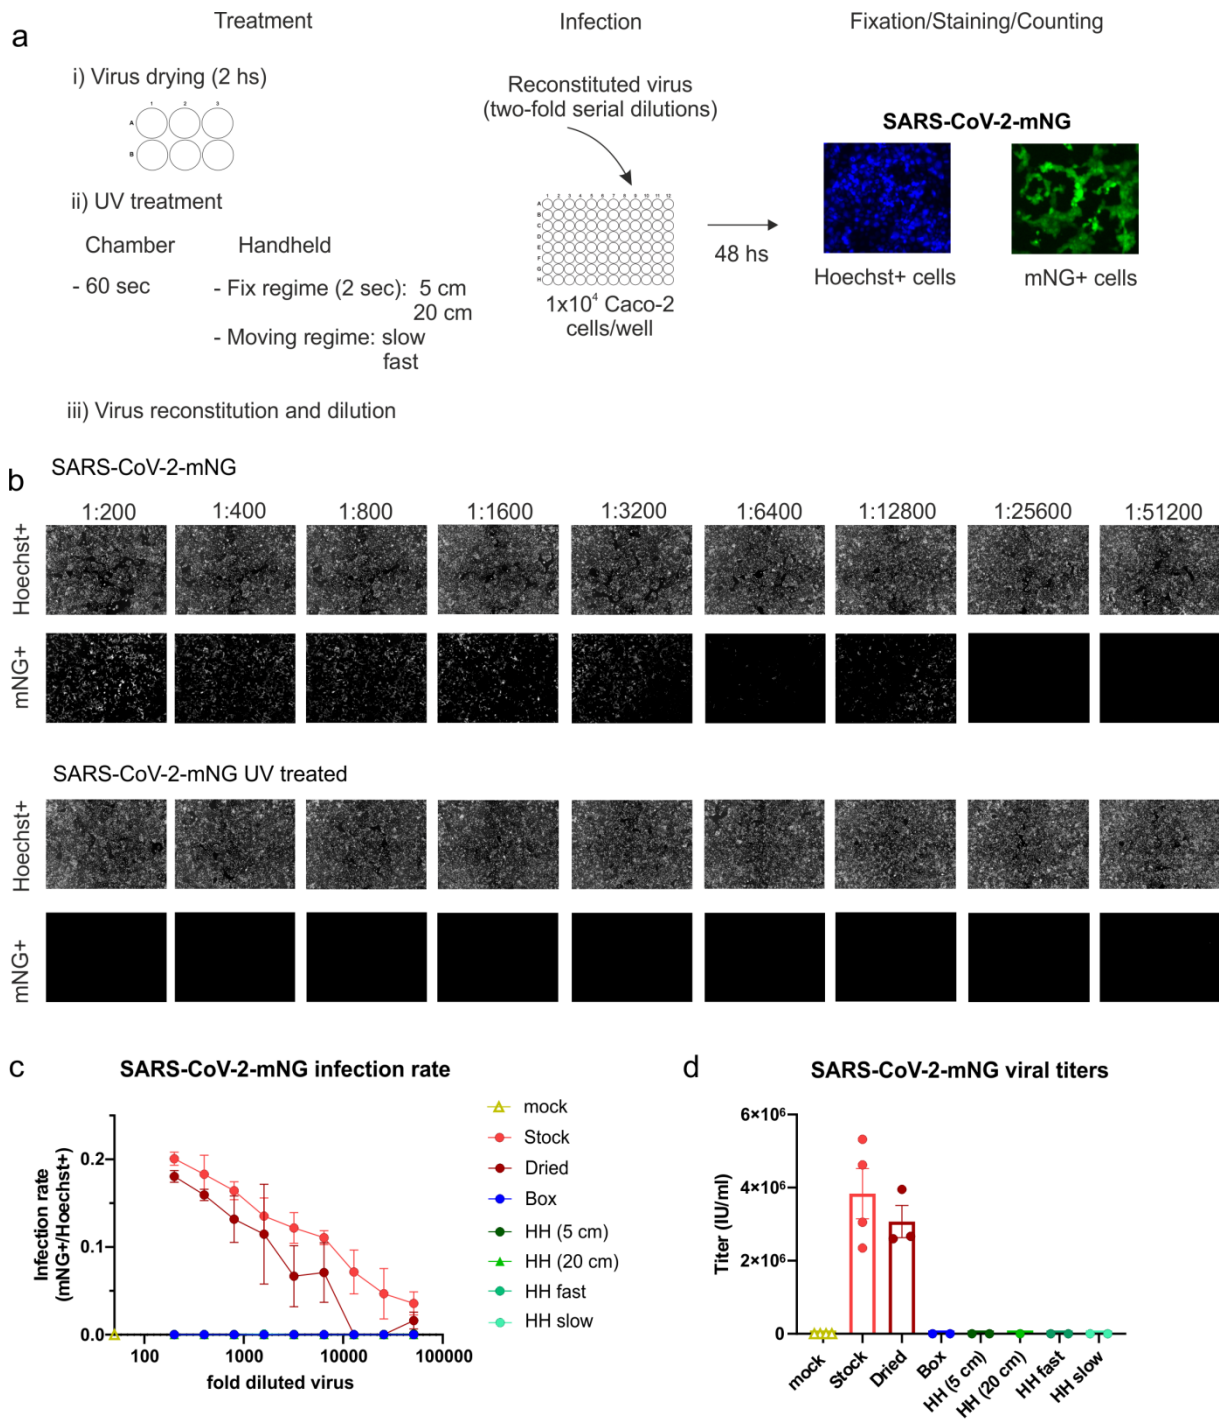

243

244 **Figure 1. Inactivation of SARS-CoV-2 by UV-C light treatment.** (a) Experimental layout of  
 245 the different UV-treatments and the infection assay employed using the green-fluorescent  
 246 virus SARS-CoV-2.mNG. (b) Primary data showing the results of the infection assay using  
 247 the non-treated stock virus as a positive control and the UV-treated virus (HH, fast-moving  
 248 regime). In the upper row, the total amount of cells for each well of the two-fold serial dilution

249 of virus is shown as Hoechst+. In the lower, infected cells are visualized indicated as mNG+  
250 cells. (c) Infection rate curves for UV-irradiated SARS-CoV-2-mNG using different UV-  
251 treatments. The graph shows the infection rate at each two-fold serial dilution, calculated as  
252 the number of infected cells (mNG+) over the total number of cells (Hoechst+) for the non-  
253 treated viral stock (n=4), dried viral stock (n=3), and dried and UV-irradiated virus using five  
254 different UV-treatments (n=2). Data are presented as mean +/- SEM of the number of  
255 biological replicates indicated above. (d) SARS-CoV-2-mNG viral titers after UV-treatment.  
256 The graph shows the viral titers calculated in IU/mL for the mock-infected, non-treated, and  
257 dried stock as well as the dried and UV-irradiated virus under the different treatments. The  
258 number of biological replicates is directly plotted and indicated in 1c. Data are presented as  
259 mean +/- SEM.

260

261 **Supplemental Movie 1. UV-irradiation using the Handheld device, slow-moving regime.**

262 SARS-CoV-2-mNG was spotted in a 6-well plate, dried for two hs and UV-irradiated as shown  
263 in the video. Speed is calculated at approx. 3.75 cm/s.

264

265 **Supplemental Movie 2. UV-irradiation using the Handheld device, fast-moving regime.**

266 SARS-CoV-2-mNG was spotted in a 6-well plate, dried for two hs and UV-irradiated as shown  
267 in the video. Speed is calculated at approx. 12.5 cm/s.

268

269
